# Supplementary material for: Multigrain electrospun nickel doped lithium titanate nanofibers with high power lithium ion storage
Source: Royal Society of Chemistry journal article supplement (doi:10.1039/c6ta04046b), 2016-01-01
Supplement: c6ta04046b1.pdf [file c6ta04046b1.pdf]

## Supporting Information

### Multigrain Electrospun Nickel Doped Lithium Titanate Nanofibers with High Power Lithium Ion Storage

Salah Abureden, Fathy M Hassan, Gregory Lui, Wook Ahn, Serubbabel Sy, Aiping Yu, and Zhongwei Chen

Table S1. Performance comparison with other reports in literature (capacities in mAh.g<sup>-1</sup>)

|                             | <i>Morphology</i>   | <i>Dopant</i>          | <i>0.2 C</i>      | <i>10 C</i>      | <i>20 C</i>    | <i>50 C</i>    |
|-----------------------------|---------------------|------------------------|-------------------|------------------|----------------|----------------|
| <i>This work</i>            | <i>Nanofibers</i>   | <i>Ni</i>              | <i>190</i>        | <i>134.9</i>     | <i>116</i>     | <i>63</i>      |
| <i>Ref.1</i> <sup>1</sup>   | <i>Nanoparticle</i> | <i>Ni</i>              | <i>170</i>        | <i>No Data</i>   | <i>No Data</i> | <i>No Data</i> |
| <i>Ref.2</i> <sup>2</sup>   | <i>Nanoparticle</i> | <i>Ni</i>              | <i>150@0.5 C</i>  | <i>72 /5 C</i>   | <i>No Data</i> | <i>No Data</i> |
| <i>Ref.3</i> <sup>3</sup>   | <i>Nanoparticle</i> | <i>Ni/Mn</i>           | <i>172@0.5C</i>   | <i>No Data</i>   | <i>No Data</i> | <i>No Data</i> |
| <i>Ref.4</i> <sup>4</sup>   | <i>Nanofibers</i>   | <i>Zr<sup>+4</sup></i> | <i>151/ 0.1 C</i> | <i>135</i>       | <i>130</i>     | <i>No Data</i> |
| <i>Ref.5</i> <sup>5</sup>   | <i>Nanowire</i>     | <i>Sr</i>              | <i>161.2</i>      | <i>110</i>       | <i>96.2</i>    | <i>No Data</i> |
| <i>Ref.6</i> <sup>6</sup>   | <i>Nanoparticle</i> | <i>Cr</i>              | <i>145/ 1 C</i>   | <i>125</i>       | <i>No Data</i> | <i>No Data</i> |
| <i>Ref.7</i> <sup>7</sup>   | <i>Nano article</i> | <i>V</i>               | <i>177/ 0.1 C</i> | <i>117 @ 5 C</i> | <i>No Data</i> | <i>No Data</i> |
| <i>Ref.8</i> <sup>8</sup>   | <i>Nano Sheets</i>  | <i>Zn</i>              | <i>182.4</i>      | <i>122.4</i>     | <i>No Data</i> | <i>No Data</i> |
| <i>Ref.9</i> <sup>9</sup>   | <i>Nanoparticle</i> | <i>Ni</i>              | <i>167.2</i>      | <i>150@ 5 C</i>  | <i>No Data</i> | <i>No Data</i> |
| <i>Ref.10</i> <sup>10</sup> | <i>Nanoparticle</i> | <i>Ag</i>              | <i>192.9</i>      | <i>163@ 4 C</i>  | <i>No Data</i> | <i>No Data</i> |

## References

1. J. Kim, S.-W. Kim, H. Gwon, W.-S. Yoon and K. Kang, *Electrochimica Acta*, 2009, **54**, 5914-5918.
2. C. Lin, M. O. Lai, L. Lu, H. Zhou and Y. Xin, *Journal of Power Sources*, 2013, **244**, 272-279.
3. W. Long, X. Wang, S. Yang, H. Shu, Q. Wu, Y. Bai and L. Bai, *Materials Chemistry and Physics*, 2011, **131**, 431-435.
4. J. G. Kim, M. S. Park, S. M. Hwang, Y. U. Heo, T. Liao, Z. Sun, J. H. Park, K. J. Kim, G. Jeong, Y. J. Kim, J. H. Kim and S. X. Dou, *ChemSusChem*, **7**, 1451-1457.
5. H. Li, L. Shen, B. Ding, G. Pang, H. Dou and X. Zhang, *Nano Energy*, 2015, **13**, 18-27.
6. H. Song, S.-W. Yun, H.-H. Chun, M.-G. Kim, K. Y. Chung, H. S. Kim, B.-W. Cho and Y.-T. Kim, *Energy & Environmental Science*, 2012, **5**, 9903.
7. Z. Yu, X. Zhang, G. Yang, J. Liu, J. Wang, R. Wang and J. Zhang, *Electrochimica Acta*, 2011, **56**, 8611-8617.
8. Z. Zhang, L. Cao, J. Huang, S. Zhou, Y. Huang and Y. Cai, *Ceramics International*, 2013, **39**, 6139-6143.
9. C. Qiu, Z. Yuan, L. Liu, N. Ye and J. Liu, *Journal of Solid State Electrochemistry*, 2012, **17**, 841-847.
10. S. Huang, Z. Wen, X. Zhu and Z. Gu, *Electrochemistry Communications*, 2004, **6**, 1093-1097.
